# Supplementary material for: MicroCT-based phenomics in the zebrafish skeleton reveals virtues of deep phenotyping in a distributed organ system
Source: eLife journal article supplement (doi:10.7554/elife.26014), 2017-09-07

**A**Cent.Vol ( $\mu\text{m}^3$ )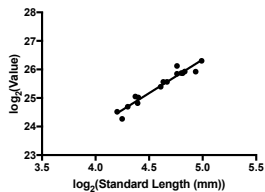**B**

Cent.TMC (mgHA)

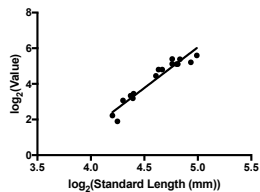**C**Cent.Th ( $\mu\text{m}$ )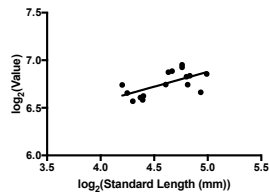**D**Cent.Le ( $\mu\text{m}$ )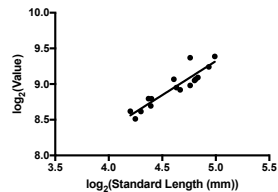**E**Haem.Vol ( $\mu\text{m}^3$ )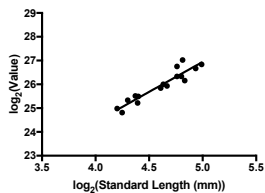**F**

Haem.TMC (mgHA)

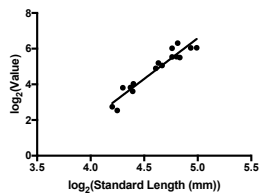**G**Haem.Th ( $\mu\text{m}$ )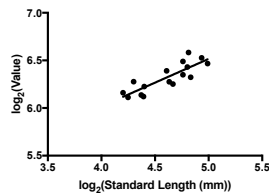**H**Neur.Vol ( $\mu\text{m}^3$ )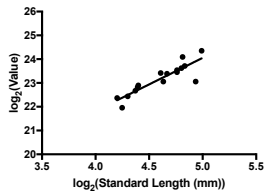**I**

Neur.TMC (mgHA)

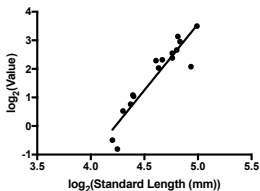**J**Neur.Th ( $\mu\text{m}$ )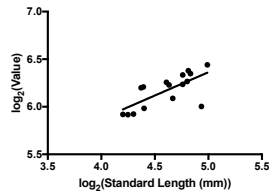

Supplement: supp [file elife-26014-supp-v1.zip]
