# Supplementary material for: MicroCT-based phenomics in the zebrafish skeleton reveals virtues of deep phenotyping in a distributed organ system
Source: eLife journal article supplement (doi:10.7554/elife.26014), 2017-09-07

Cent.Vol ( $\mu\text{m}^3$ )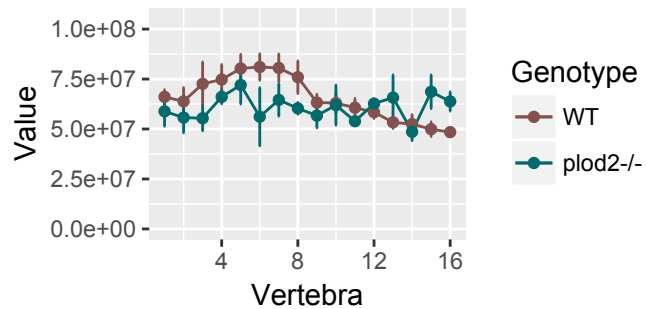Cent.TMD (mgHA/cm<sup>3</sup>)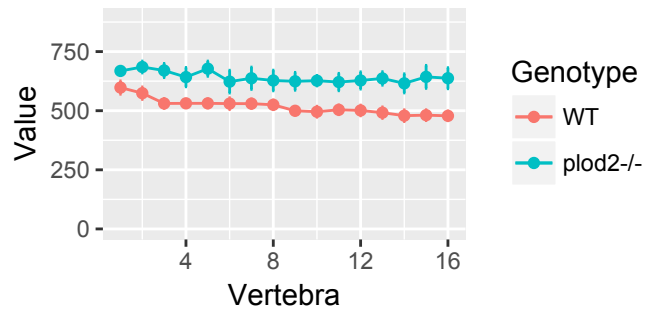Cent.Th ( $\mu\text{m}$ )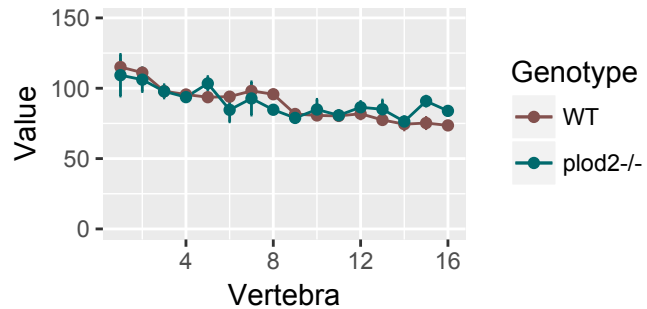Cent.Le ( $\mu\text{m}$ )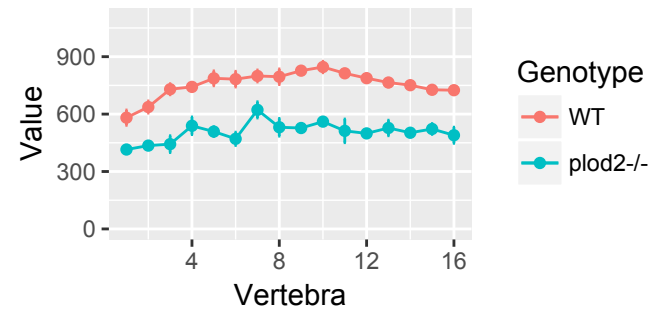Haem.Vol ( $\mu\text{m}^3$ )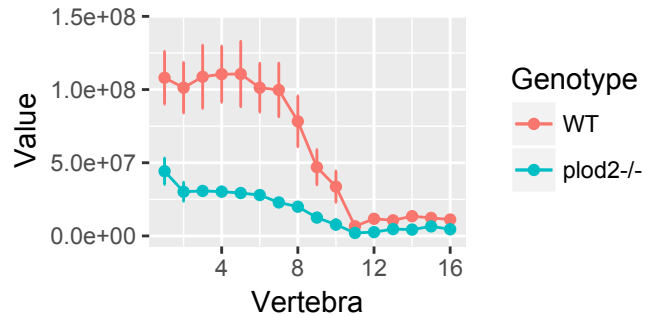Haem.TMD (mgHA/cm<sup>3</sup>)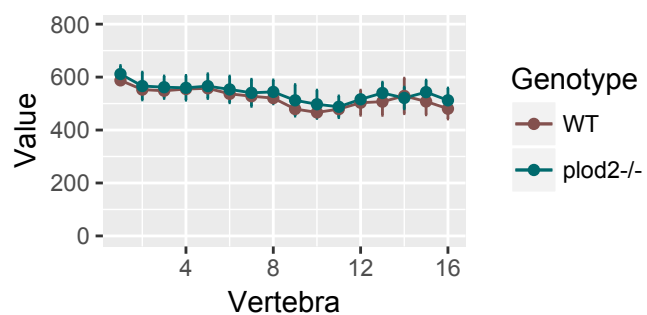Haem.Th ( $\mu\text{m}$ )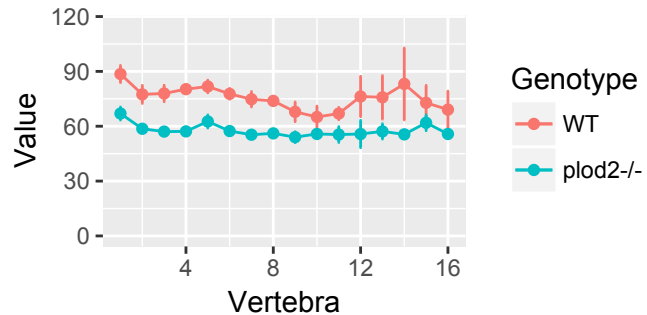Neur.Vol ( $\mu\text{m}^3$ )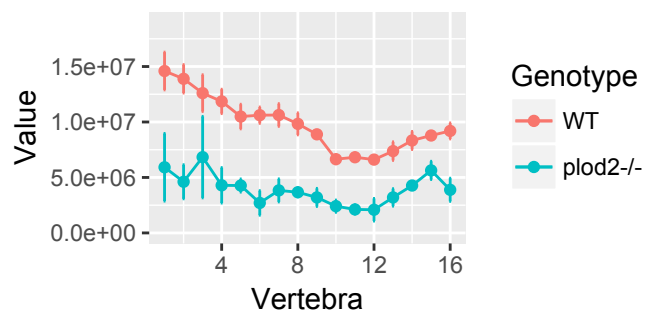Neur.TMD (mgHA/cm<sup>3</sup>)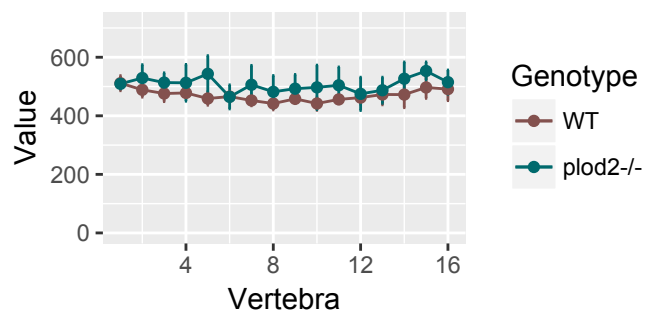Neur.Th ( $\mu\text{m}$ )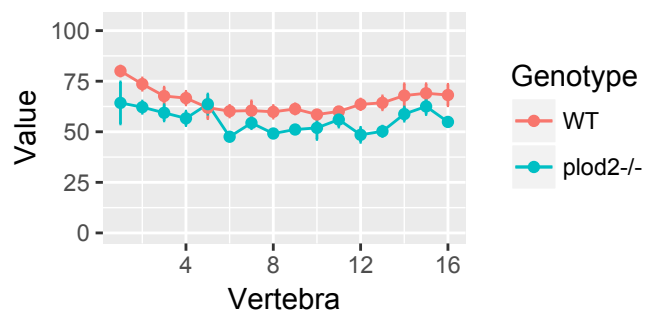

Supplement: supp [file elife-26014-supp-v1.zip]
