# Supplementary figures and images for: MicroCT-based phenomics in the zebrafish skeleton reveals virtues of deep phenotyping in a distributed organ system
Source: eLife journal article supplement (doi:10.7554/elife.26014), 2017-09-07

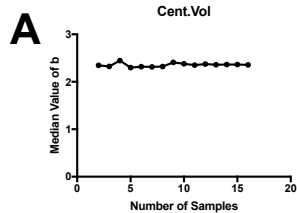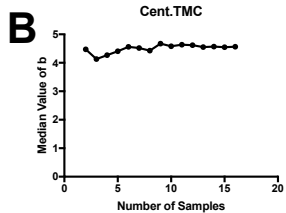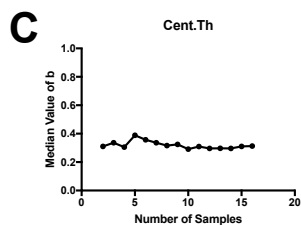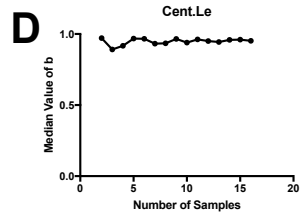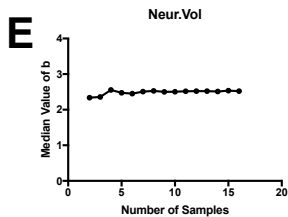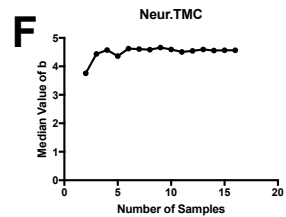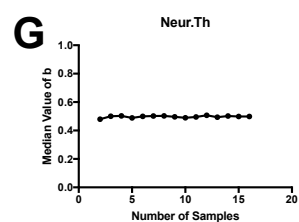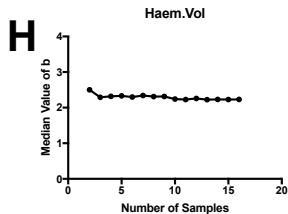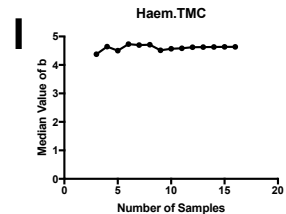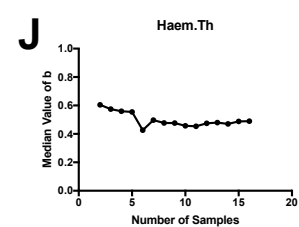

Supplement: supp [file elife-26014-supp-v1.zip]

# Vertebra 1

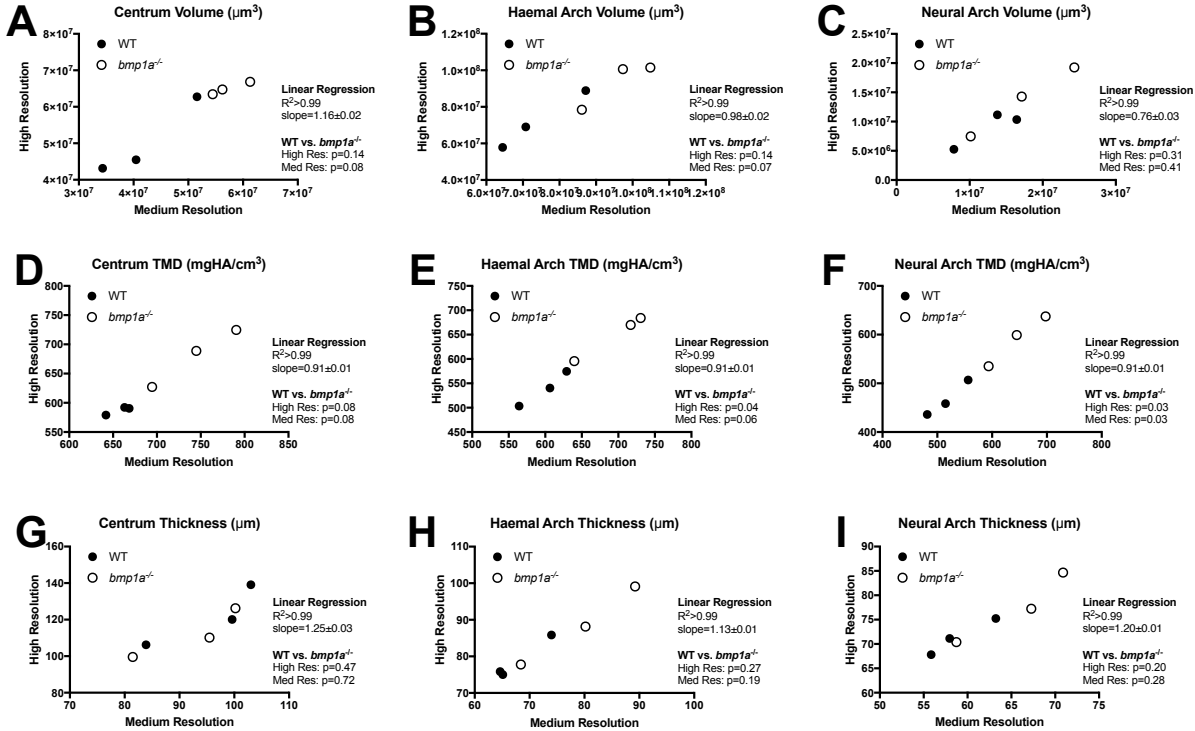

# Vertebra 3

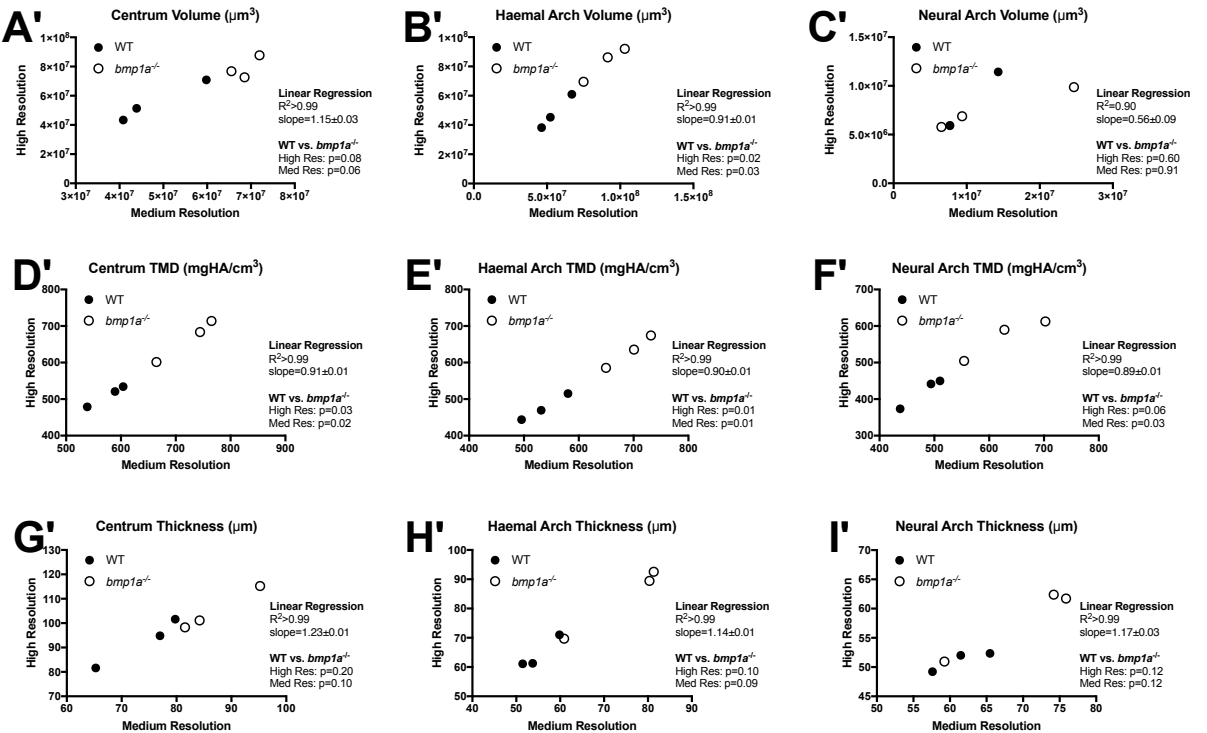

Supplement: supp [file elife-26014-supp-v1.zip]
